# Supplementary material for: Template free electrochemical deposition of ZnSb nanotubes for Li ion battery anodes
Source: Royal Society of Chemistry journal article supplement (doi:10.1039/c1cc13900b), 2011-01-01
Supplement: c1cc13900b.pdf [file c1cc13900b.pdf]

## EXPERIMENTAL SECTION

### Electrochemical deposition of ZnSb:

The electrochemical depositions were carried out in a three-electrode cell by using a potentiostat/galvanostat Ch 1200A instrument. The working electrodes were ITO glass (Kintec Co.) with 10 ohm/sq conductivity. Before electrodeposition, the ITO substrates were rinsed with ethanol to remove any impurities and then left to dry. A platinum wire with a diameter of 0.5 mm was used as a counter electrode and an Ag/AgCl electrode was used as the reference. The distance between the working and counter electrodes was fixed at 2.0 cm. The bath was filled with ethylene glycol (99.5 purity, Sigma-Aldrich) containing ZnCl<sub>2</sub> (99.5 purity, Sigma-Aldrich) and SbCl<sub>3</sub> (99.95 purity, Sigma-Aldrich).

Constant potentials in the range of 3-9 V were applied for electrochemical deposition. Electrochemical deposition process was performed at room temperature without any stirring or inert-gas bubbling. After deposition, the electrodes were rinsed with ethanol several times and then dried in vacuum oven for 6 hours.

### Characterization:

The sample morphology was examined using a transmission electron microscopy (TEM; JEOL, JEM-2100) and a field-emission scanning electron microscopy (FESEM; JEOL, JSM-7600F). The elemental compositions of the samples were analyzed with energy-dispersive X-ray spectroscopy (EDX) attached to the TEM. Crystallographic information for the samples was collected using a powder X-ray diffractometer (Bruker AXS: D8 advance, Cu K $\alpha$  radiation with  $\lambda = 1.5406 \text{ \AA}$ ).

Electrochemical Measurements:

To prepare the composite, Zn-Sb crystals deposited on ITO substrates were ultrasonicated in ethanol and the dispersed powders were centrifuged and washed with ethanol and water twice. The powder was then dried in 70°C in a vacuum oven for 16 hours. The prepared Zn-Sb powder was physically mixed with 20 wt % SWCNT which was added as a conducting agent. The CNT was the single walled, purified, highly functioned P3 type purchased from Carbon Solutions, Inc.

Anode electrodes were prepared by coating slurries containing the active material Zn-Sb mixed with SWCNT, carbon black (10 wt %) as a conductor, and polyvinylidene fluoride (PVDF) dissolved in N-methyl pyrrolidinone (NMP) as a binder (10 wt %) on copper foil substrates.

Assembly of the coin-type battery cells was performed in an Ar-filled glove box with moisture and oxygen lower than 1.00 ppm. Li foil was used both as the counter and reference electrodes, while 1M LiPF<sub>6</sub> in ethylene carbonate (EC)/diethyl carbonate (DEC) (1:1 by volume) was used as the electrolyte. All the coin cells were tested using a NEWWARE battery tester galvanostatically between 0.0 V and 2.0 V (vs. Li/Li<sup>+</sup>) at a current density of 100 mA/g (0.18 C).

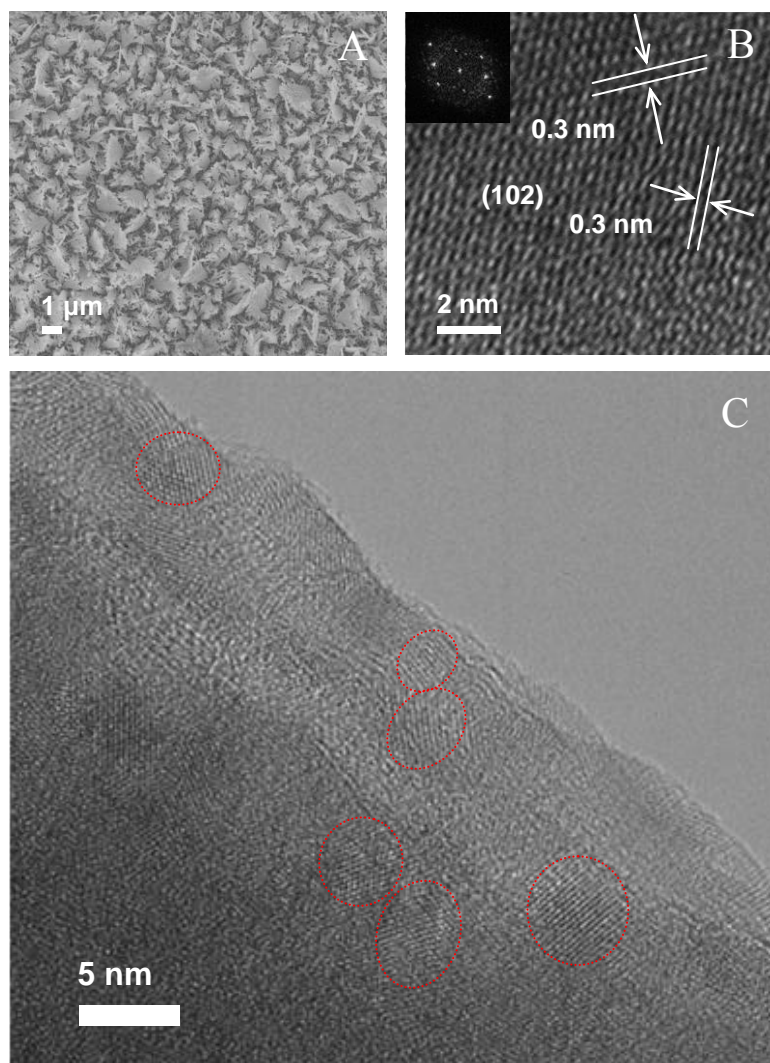

**Figure 1** (A) SEM images, (B, C) HRTEM images of Zn-Sb nanotubes electrodeposited in ethylene glycol solution with a precursor molar ratio  $I_{\text{ZnCl}_2\text{-SbCl}_3} = 1.6$  and an applied voltage  $V_d = -7$  V for 200 s on ITO glass. The inset in (B) is the fast Fourier transform pattern of the lattice structure.

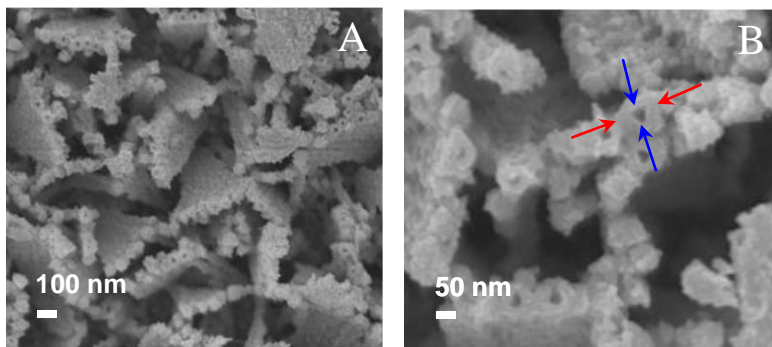

**Figure S2** SEM of Zn-Sb nanotubes deposited in ethylene glycol solution with precursor ratio  $I_{\text{ZnCl}_2\text{-SbCl}_3} = 1.6$  and  $V_d = -9\text{V}$  for 200 s on ITO glass.

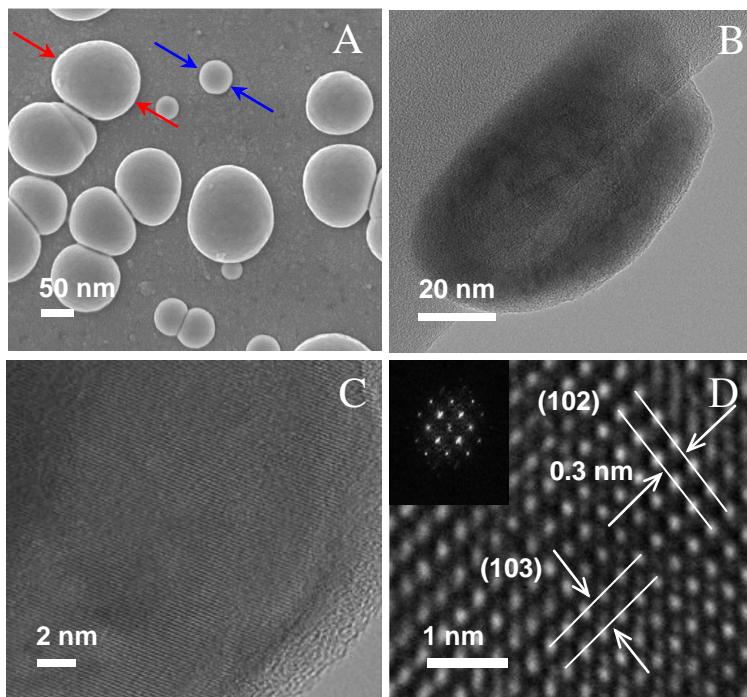

**Figure S3** (A) SEM, (B) TEM, (D,E) HRTEM of ZnSb nanoparticles deposited in ethylene glycol solution with precursor ratio  $I_{\text{ZnCl}_2\text{-SbCl}_3} = 2$  and  $V_d = -2\text{V}$  for 200 s.

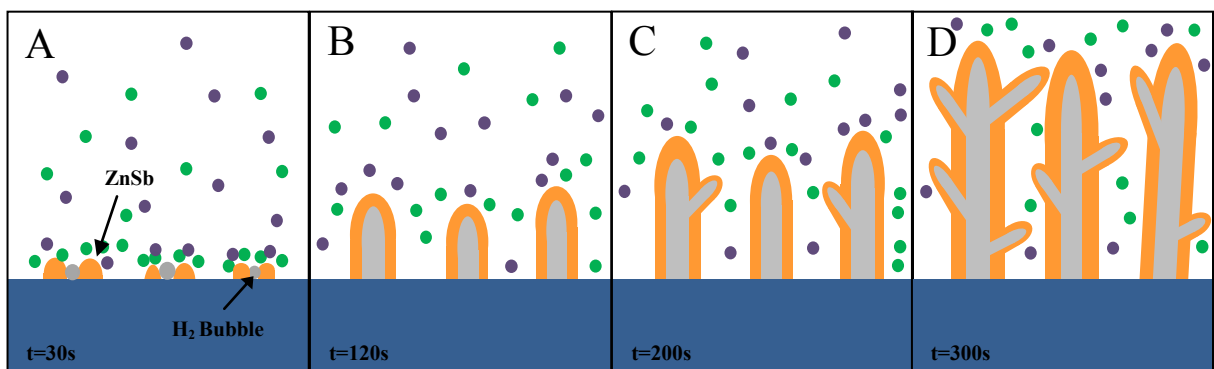

**Figure S4** Schematic drawing of ZnSb nanotubes depositing on ITO glass in ethylene glycol solution with precursor molar ratios of  $I_{\text{ZnCl}_2\text{-SbCl}_3} = 1.6$  and  $V_d = -7$  V for different times, (A) 30 s, (B) 120 s, (C) 200 s, (D) 300 s.

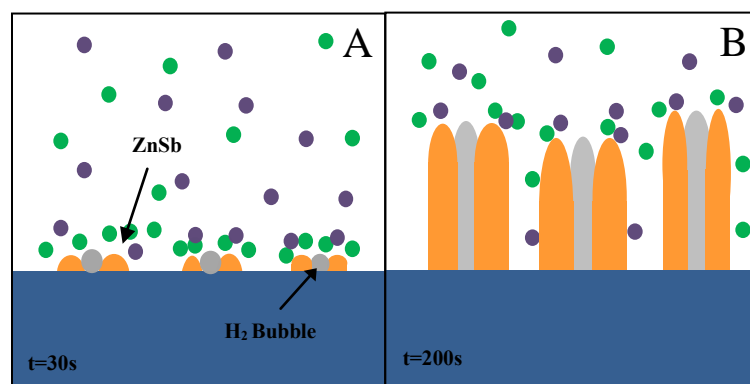

**Figure S5** Schematic drawing of ZnSb nanotubes depositing on ITO glass in ethylene glycol solution with precursor molar ratios of  $I_{\text{ZnCl}_2\text{-SbCl}_3} = 1.6$  and  $V_d = -9$  V for different times, (A) 30 s, (B) 200 s.

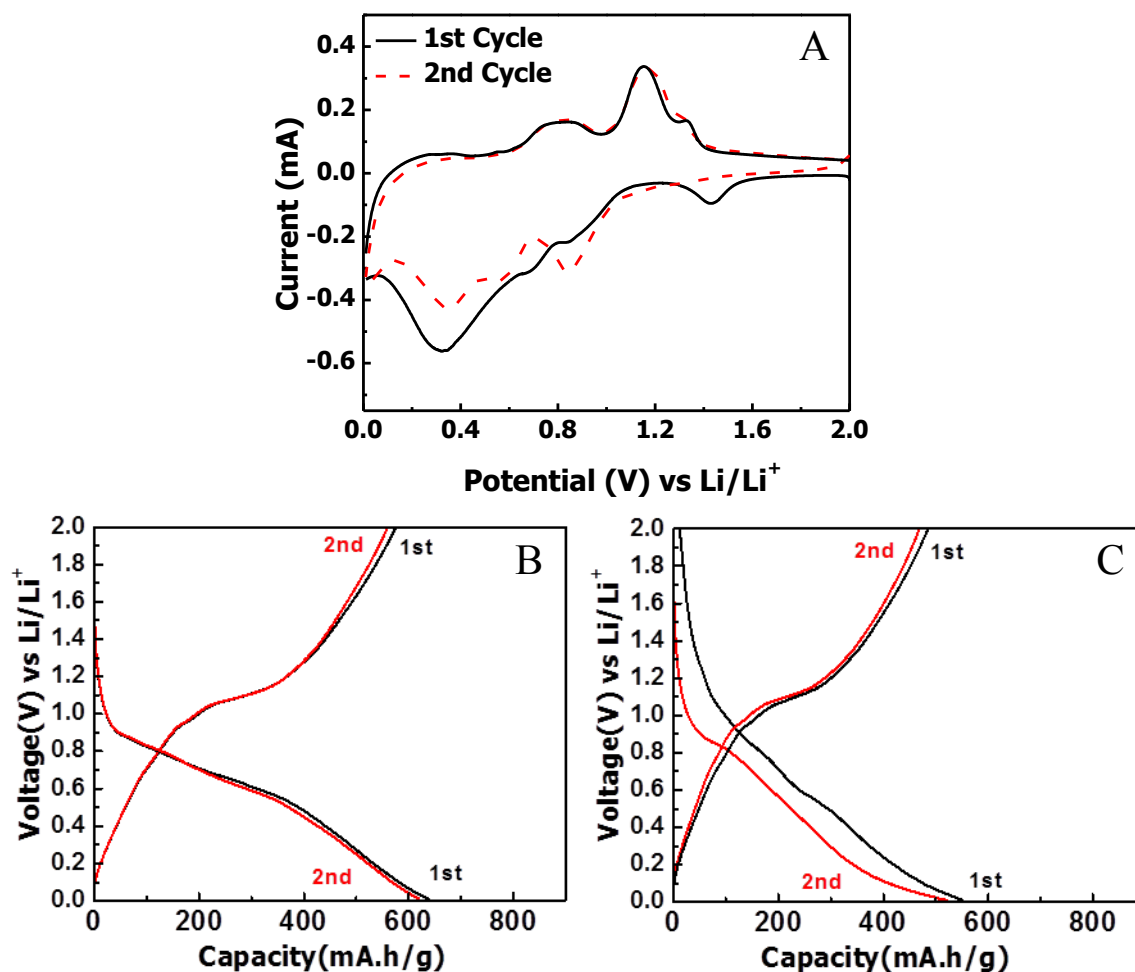

**Figure S6** (A) Cyclic voltammograms (CVs) of the first and second cycles of ZnSb nanotubes obtained with  $I_{\text{ZnCl}_2\text{-SbCl}_3} = 1.6$  and  $V_d = -7$  V at a scan rate of 0.5 mV/s, (B) Charge/discharge voltage profiles of ZnSb nanotubes between 0-2 V (vs Li/Li<sup>+</sup>) at a current density of 100 mA/g (0.18 C), (C) Charge/discharge voltage profiles of ZnSb nanoparticles between 0-2 V (vs Li/Li<sup>+</sup>) at a current density of 100 mA/g (0.18 C).



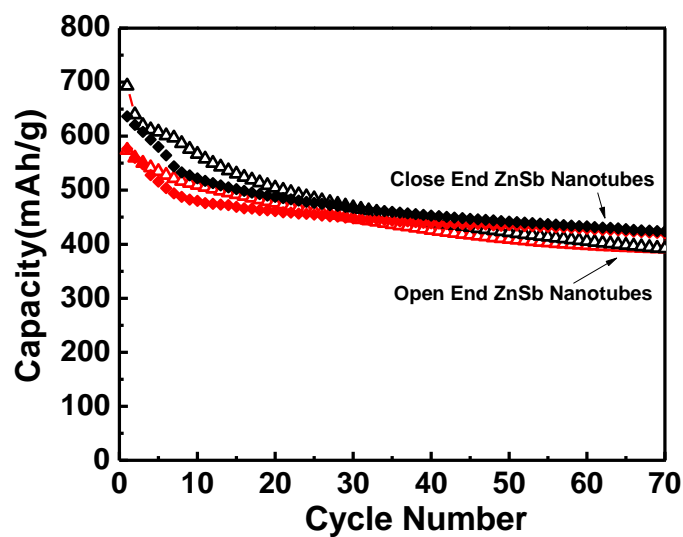

**Figure S7** Charge/discharge cycling performance of open and close end ZnSb nanotubes between 0-2 V (vs Li/Li<sup>+</sup>) at a current density of 100 mA/g (0.18 C).

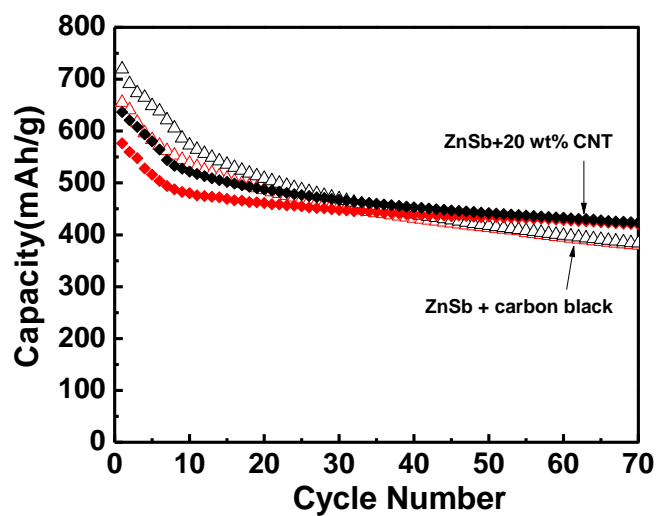

**Figure S8** Charge/discharge cycling performance of ZnSb nanotube electrodes with and without addition of 20 wt% CNT between 0-2 V (vs Li/Li<sup>+</sup>) at a current density of 100 mA/g (0.18 C).
